# Supplementary material for: Domain-Adaptive Artificial Intelligence-Based Model for Personalized Diagnosis of Trivial Lesions Related to COVID-19 in Chest Computed Tomography Scans
Source: MDPI journal article supplement (doi:10.3390/jpm11101008), 2021-10-07
Supplement: s1 [file s1]

Supplementary Materials

# Domain-Adaptive Artificial Intelligence-Based Model for Personalized Diagnosis of Trivial Lesions Related to COVID-19 in Chest Computed Tomography Scans

Muhammad Owais, Na Rae Baek and Kang Ryoung Park \*

Division of Electronics and Electrical Engineering, Dongguk University, 30 Pildong-ro 1-gil, Jung-gu, Seoul 04620, Korea; malikowais266@gmail.com (M.O.); naris27@dgu.ac.kr (N.R.B.)

\* Correspondence: parkgr@dgu.edu; Tel.: +82-10-3111-7022

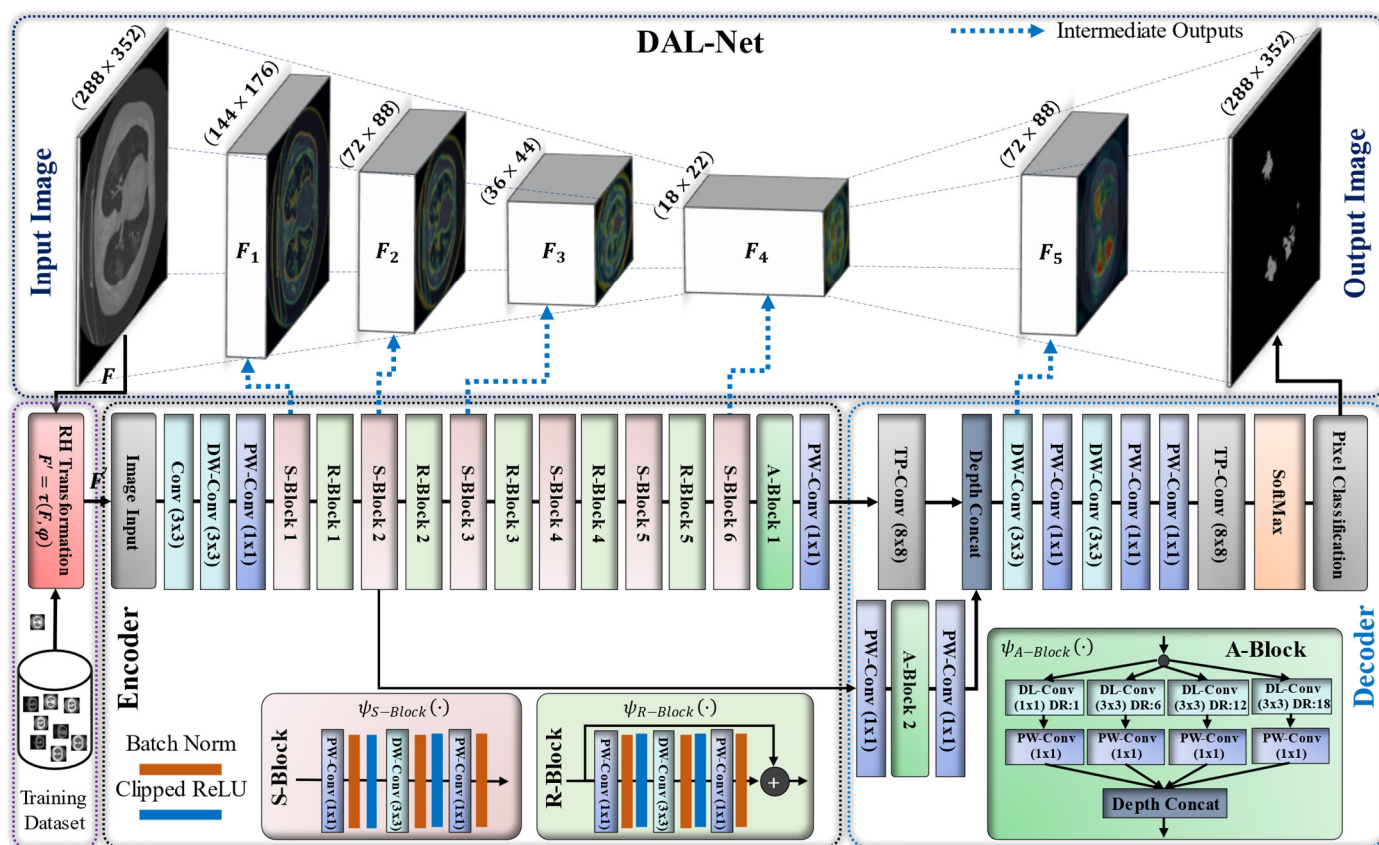

**Figure S1.** Overall architecture of the proposed DAL-Net with preprocessing method. (“Conv: Convolutional”, “Depth Concat: Depth concatenation”, “Crop Ref: Crop reference”)

**Table S1.** Layer-wise configuration details of the proposed DAL-Net. (“ $x^2 = x \times x$ ”, “–”: Not applicable”, “#Par.: Number of parameters”)

|                                      | Layer Name           | Input Size | Output Size | Filter Size          | #Filter         | Stride  | #Par.     |
|--------------------------------------|----------------------|------------|-------------|----------------------|-----------------|---------|-----------|
| Encoder                              | Image Input          | 288×352×3  | –           | –                    | –               | –       | –         |
|                                      | Conv                 | 288×352×3  | 144×176×32  | $3^2$                | 32              | 2       | 960       |
|                                      | DW-Conv              | 144×176×32 | 144×176×32  | $3^2$                | 32              | 1       | 384       |
|                                      | PW-Conv              | 144×176×32 | 144×176×16  | $1^2$                | 16              | 1       | 560       |
|                                      | S-Block 1            | 144×176×16 | 72×88×24    | $1^2, 3^2, 1^2$      | 96,96,24        | 1,2,1   | 5,352     |
|                                      | R-Block 1            | 72×88×24   | 72×88×24    | $1^2, 3^2, 1^2$      | 144,144,24      | 1,1,1   | 9,144     |
|                                      | S-Block 2            | 72×88×24   | 36×44×32    | $1^2, 3^2, 1^2$      | 144,144,32      | 1,2,1   | 10,320    |
|                                      | R-Block 2            | 36×44×32   | 36×44×32    | $1^2, 3^2, 1^2$      | 192,192,32      | 1,1,1   | 15,264    |
|                                      | S-Block 3            | 36×44×32   | 18×22×64    | $1^2, 3^2, 1^2$      | 192,192,64      | 1,2,1   | 21,504    |
|                                      | R-Block 3            | 18×22×64   | 18×22×64    | $1^2, 3^2, 1^2$      | 384,384,64      | 1,1,1   | 55,104    |
|                                      | S-Block 4            | 18×22×64   | 18×22×96    | $1^2, 3^2, 1^2$      | 384,384,96      | 1,1,1   | 67,488    |
|                                      | R-Block 4            | 18×22×96   | 18×22×96    | $1^2, 3^2, 1^2$      | 576,576,96      | 1,1,1   | 119,520   |
|                                      | S-Block 5            | 18×22×96   | 18×22×160   | $1^2, 3^2, 1^2$      | 576,576,160     | 1,1,1   | 156,576   |
|                                      | R-Block 5            | 18×22×160  | 18×22×160   | $1^2, 3^2, 1^2$      | 960,960,160     | 1,1,1   | 322,080   |
|                                      | S-Block 6            | 18×22×160  | 18×22×320   | $1^2, 3^2, 1^2$      | 960,960,320     | 1,1,1   | 476,160   |
|                                      | A-Block 1            | 18×22×320  | 18×22×1024  | $1^2, 3^2, 3^2, 3^2$ | 320,320,320,320 | 1,1,1,1 | 340,992   |
|                                      |                      |            |             | $(1,6,12,18)^*$      | 256,256,256,256 | 1,1,1,1 |           |
|                                      | PW-Conv              | 18×22×1024 | 18×22×256   | $1^2$                | 256             | 1       | 262,912   |
| Decoder                              | TP-Conv              | 18×22×256  | 72×88×256** | $8^2$                | 256             | 4       | 4,194,560 |
|                                      | PW-Conv              | 72×88×144  | 72×88×320   | $1^2$                | 320             | 1       | 47,040    |
|                                      | A-Block 2            | 72×88×320  | 72×88×1024  | $1^2, 3^2, 3^2, 3^2$ | 320,320,320,320 | 1,1,1,1 | 340,992   |
|                                      |                      |            |             | $(1,6,12,18)^*$      | 256,256,256,256 | 1,1,1,1 |           |
|                                      | PW-Conv              | 72×88×1024 | 72×88×48**  | $1^2$                | 48              | 1       | 49,296    |
|                                      | Depth Concat         | **         | 72×88×304   | –                    | –               | –       | –         |
|                                      | DW-Conv              | 72×88×304  | 72×88×304   | $3^2$                | 304             | 1       | 3,040     |
|                                      | PW-Conv              | 72×88×304  | 72×88×256   | $1^2$                | 256             | 1       | 78,592    |
|                                      | DW-Conv              | 72×88×256  | 72×88×256   | $3^2$                | 256             | 1       | 2,560     |
|                                      | PW-Conv              | 72×88×256  | 72×88×256   | $1^2$                | 256             | 1       | 66,304    |
|                                      | PW-Conv              | 72×88×256  | 72×88×2     | $1^2$                | 2               | 1       | 514       |
|                                      | TP-Conv              | 72×88×2    | 288×352×2   | $8^2$                | 2               | 4       | 258       |
|                                      | SoftMax              | 288×352×2  | 288×352×2   | –                    | –               | –       | –         |
|                                      | Pixel Classification | –          | –           | –                    | –               | –       | –         |
| Total learning parameters: 6,647,476 |                      |            |             |                      |                 |         |           |

\* Dilation factor, \*\*Input feature vectors fed to depth concatenation (Depth Concat) layer.
